# Supplementary material for: NLRP3 associated with chronic kidney disease progression after ischemia/reperfusion-induced acute kidney injury
Source: PubMed Central journal article supplement (PMC8556399; doi:10.1038/s41420-021-00719-2), 2021-10-29
Supplement: 41420_2021_719_MOESM3_ESM.pdf [file 41420_2021_719_MOESM3_ESM.pdf]

## **Supplementary figure legends**

### **Supplementary Figure S1. Renal NGAL expression in mild or severe AKI mice.**

(a) Western blot examined the change of NGAL in murine kidney tissue with mild or severe IRI. (b) Representative images of NGAL staining in injured kidneys. Scale bar=20  $\mu\text{m}$  in all images. All values are means  $\pm$  SD. \*\* $p < 0.01$  and \*\*\*\* $p < 0.0001$  defined as significant.

### **Supplementary Figure S2. Kidney section stained with NLRP3 and LTL.**

Twenty-eight days after IRI or sham surgery, murine kidneys were stained with NLRP3 and lotus tetragonolobus lectin (LTL) which is a proximal tubular marker. Scale bar=20  $\mu\text{m}$  in all images.
