# Supplementary material for: NLRP3 associated with chronic kidney disease progression after ischemia/reperfusion-induced acute kidney injury
Source: PubMed Central journal article supplement (PMC8556399; doi:10.1038/s41420-021-00719-2), 2021-10-29
Supplement: 41420_2021_719_MOESM5_ESM.pdf [file 41420_2021_719_MOESM5_ESM.pdf]

## **Supplementary table legends**

### **Supplementary Table S1. Evaluation of histopathological parameters to renal damage and maladaptive repair.**

The pathological parameters of (a) acute tubular injury and (b) renal maladaptive repair were set in the table. The each histological parameter was graded from 0 to 3 according to the distribution of lesions: 0=none; 1=<25%; 2=25–50%; 3=>50%. The average values of all parameters in the 10 random views of each kidney slice was counted for analysis and comparison.
