# Supplementary material for: NLRP3 associated with chronic kidney disease progression after ischemia/reperfusion-induced acute kidney injury
Source: PubMed Central journal article supplement (PMC8556399; doi:10.1038/s41420-021-00719-2), 2021-10-29
Supplement: 41420_2021_719_MOESM6_ESM.pdf [file 41420_2021_719_MOESM6_ESM.pdf]

Please complete the table below to indicate the contributions of all named authors to the figures.

Figure 1:

|  |
|--|
|  |
|--|

Figure 2:

|  |
|--|
|  |
|--|

Figure 3:

|  |
|--|
|  |
|--|

Figure 4:

|  |
|--|
|  |
|--|

Figure 5:

|  |
|--|
|  |
|--|

Figure 6:

|  |
|--|
|  |
|--|

Signed for and on behalf of the Author(s):

|                                                                                     |
|-------------------------------------------------------------------------------------|
|  |
|-------------------------------------------------------------------------------------|

Print Name:

|  |
|--|
|  |
|--|

Date:

|  |
|--|
|  |
|--|
